# Supplementary material for: Providing early indication of regional anomalies in COVID-19 case counts in England using search engine queries
Source: PubMed Central journal article supplement (PMC8837788; doi:10.1038/s41598-022-06340-2), 2022-02-11
Supplement: 41598_2022_6340_MOESM1_ESM.pdf [file 41598_2022_6340_MOESM1_ESM.pdf]

## 1 Appendix

Figure A1 shows the improvement in model fit ( $R^2$ ) as more areas are added to  $F_i^w$ . As the model shows, improvement continues, but the marginal gain decreases with the number of areas, as expected.

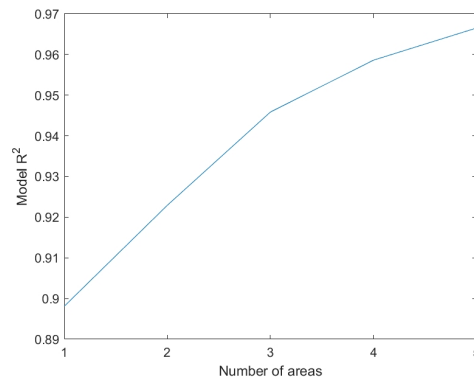

**Figure A1.** Average  $R^2$  values of the model for  $F_i^w$  as the number of areas increases.

Figure A2 shows the ROC for “cough” at a lag of 8 days during the first wave of the pandemic.

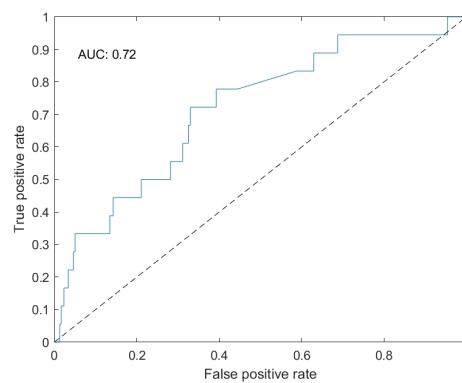

**Figure A2.** Receiver Operating Curve (ROC) for “cough” at a lag of 8 days.
